# Supplementary material for: Time-evolution of in vivo protein corona onto blood-circulating PEGylated liposomal doxorubicin (DOXIL) nanoparticles
Source: Royal Society of Chemistry journal article supplement (doi:10.1039/c5nr09158f), 2016-01-01
Supplement: c5nr09158f1.pdf [file c5nr09158f1.pdf]

# Time-evolution of *in vivo* protein corona onto blood-circulating PEGylated liposomal doxorubicin (DOXIL) nanoparticles

Marilena Hadjidemetriou, Zahraa Al-Ahmady, Kostas Kostarelos\*

*Nanomedicine Lab, School of Medicine, Faculty of Medical & Human Sciences and National Graphene Institute, The University of Manchester, Manchester M13 9PT, United Kingdom*

## Supporting Table

**Table S1: The physicochemical characteristics of PEGylated liposomal doxorubicin before and after extraction from blood circulation.** Mean vesicle diameter (nm) and  $\zeta$ -potential (mV) data from DLS and surface charge electrophoresis are shown.

| Liposome type                                                         | Size (nm)         | $\zeta$ -potential (mV) | PDI               |
|-----------------------------------------------------------------------|-------------------|-------------------------|-------------------|
| <b>Liposomes alone</b><br>(HSPC:CHOL:DSPE-PEG2000)<br>(56.3:38.2:5.5) | 114.6 $\pm$ 1.752 | -36.2 $\pm$ 0.85        | 0.056 $\pm$ 0.018 |
| Liposome: <b>10min</b> corona                                         | 102.0 $\pm$ 3.107 | -35.5 $\pm$ 1.20        | 0.123 $\pm$ 0.012 |
| Liposome: <b>1hr</b> corona                                           | 104.0 $\pm$ 1.662 | -33.5 $\pm$ 3.16        | 0.127 $\pm$ 0.032 |
| Liposome: <b>3hr</b> corona                                           | 103.1 $\pm$ 4.152 | -34.1 $\pm$ 2.37        | 0.104 $\pm$ 0.015 |

# Supporting Figures

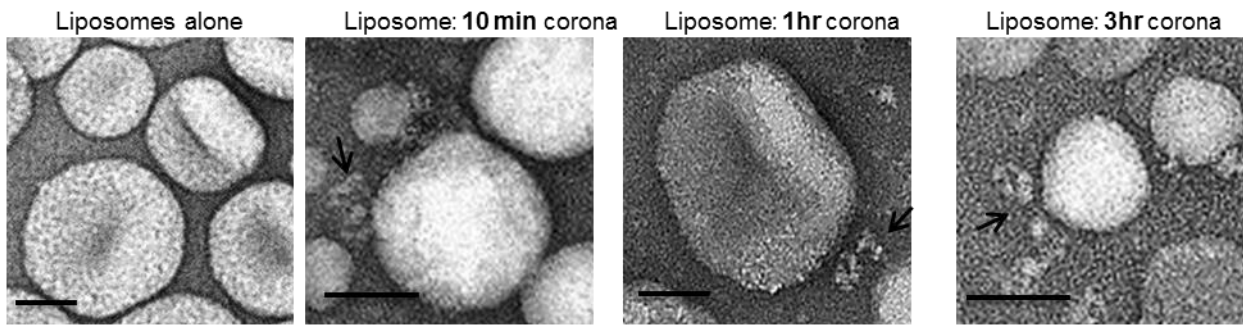

**FigureS1:** Negative stain TEM imaging of liposomes before their interaction with plasma proteins and **10 min**, **1h** and **3h** after their i.v. injection and recovery from CD-1 mice. Arrows show the presence of proteins around the surface of liposomes. All scale bars are 50nm.

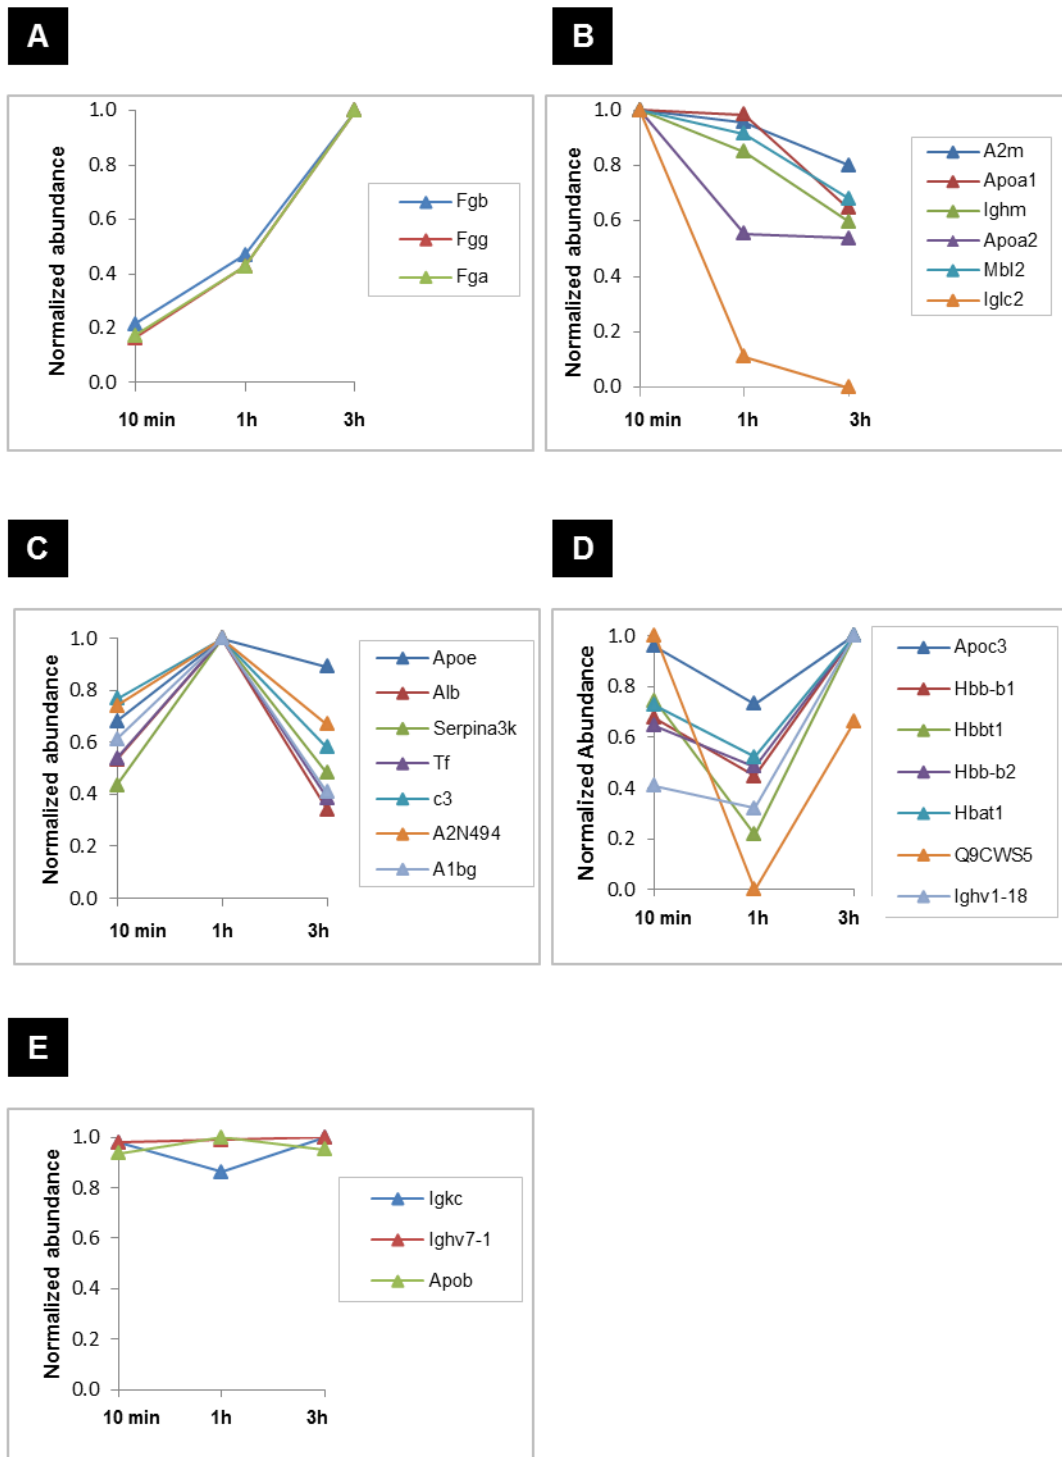

**Figure S2: Protein binding kinetics during corona evolution.** Relative values were normalized to the maximum amount (set to 1) across the three time points for each of the top-20 proteins. Corona proteins were classified into five groups: **(A)** Proteins displaying increased binding over time; **(B)** Proteins displaying reduced binding over time **(C)** Proteins characterized by low abundance at the early (t=10min) and late time points (t=3h) and higher abundance at intermediate time point (t=1h); **(D)** Proteins characterized by high abundance at the early (t=10min) and late time points (t=3h) and lower abundance at intermediate time point (t=1h); **(E)** Proteins with constant abundance over time.
